# Supplementary material
Source: publisher figshare collection journal article supplement (https://springernature.figshare.com/ndownloader/files/20775258)

Additional files 1: Figure S1

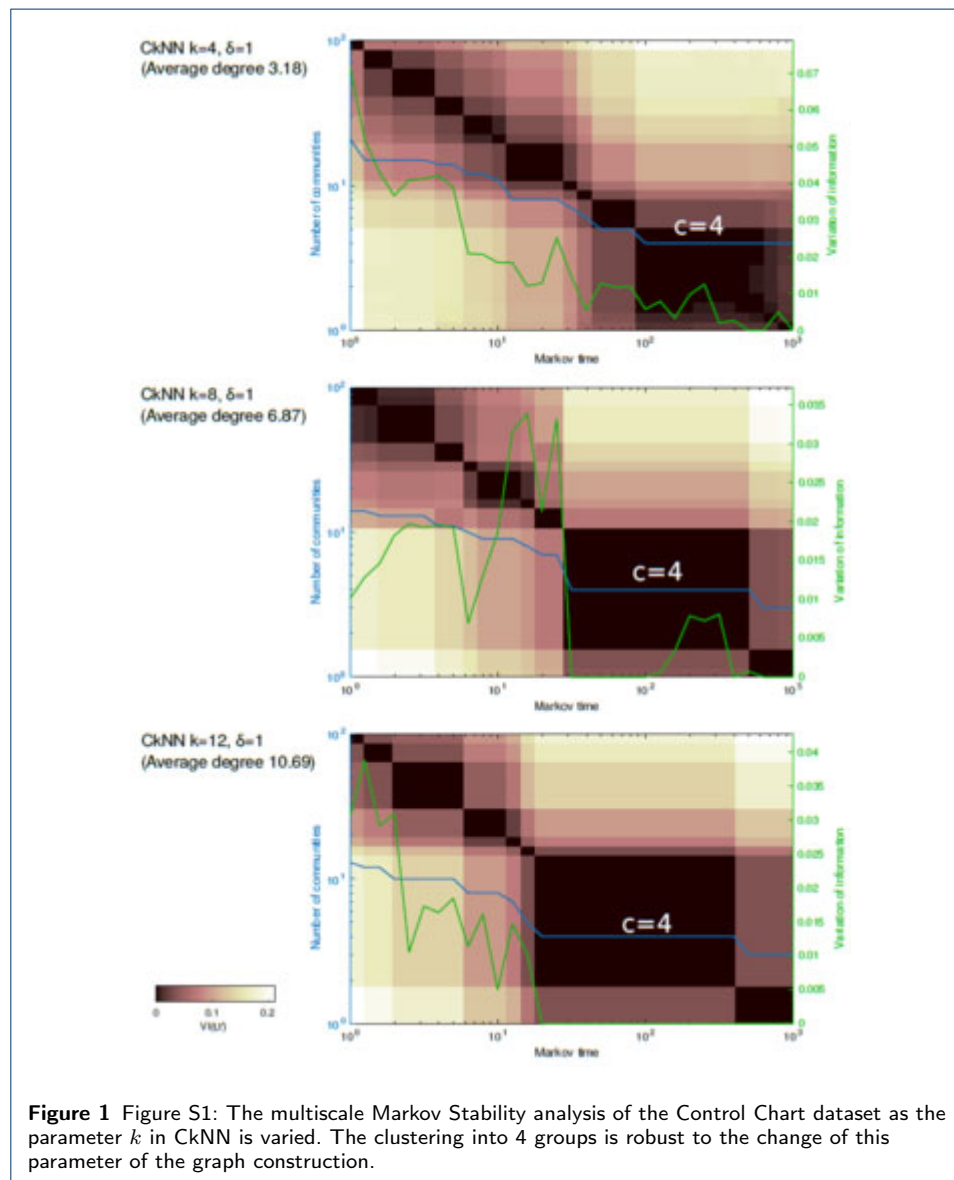

Supplement: Supplementary file 1 [file 20775258]
